# Supplementary material for: Short-wavelength ultraviolet dosimeters based on DNA nanostructure-modified graphene field-effect transistors
Source: Royal Society of Chemistry journal article supplement (doi:10.1039/d1cc01851e), 2021-01-01
Supplement: d1cc01851e1.pdf [file d1cc01851e1.pdf]

1 **Short-wavelength ultraviolet dosimeters based on DNA**  
2 **nanostructure-modified graphene field-effect transistors**

3 Zhaolin Ai,<sup>ab§</sup> Liqian Wang,<sup>ab§</sup> Qianying Guo,<sup>ab</sup> Derong Kong,<sup>ab</sup> Yungen Wu,  
4 <sup>ab</sup> Yunqi Liu<sup>b</sup> and Dacheng Wei<sup>\*a</sup>

5 *\* Corresponding authors. E-mail: weidc@fudan.edu.cn.*

6 *§ Zhaolin Ai and Liqian Wang contributed equally to this work.*

7 *<sup>a</sup> State Key Laboratory of Molecular Engineering of Polymers, Department of Macromolecular Science, Fudan*  
8 *University, Shanghai 200433, China.*

9 *<sup>b</sup> Institute of Molecular Materials and Devices, Fudan University, Shanghai 200433, China.*

# 11 **1 Experimental section**

## 12 **1.1 Materials**

13 All designed staple strands were prepared and purified by Sangon (Shanghai, China). M13mp18  
14 circular ss-DNA was purchased from New England Biolabs (Beverly, Massachusetts, USA).  
15 SYBR Safe, agarose, magnesium chloride solution and gel loading buffer were purchased from  
16 Thermal Fisher (Waltham, Massachusetts, USA). 1-pyrenebutanoic acid succinimidyl ester  
17 (PASE) was purchased from Sigma Aldrich (St. Louis, Missouri, USA). All the aqueous solutions  
18 were prepared using distilled water produced by the Milli-Q Integral 3 ultrapure water polishing  
19 system of Merck (Darmstadt, Germany) with a resistivity of  $18 \text{ M}\Omega \text{ cm}^{-1}$ .

## 20 **1.2 Synthesis of DNA structures**

21 The rectangular DNA origami was assembled in  $1\times$  TAE- $\text{Mg}^{2+}$  buffer solution (40 mM Tris-  
22 acetate, 1 mM EDTA, and 12.5 mM magnesium chloride, pH 8.0–8.4) by the reported annealing  
23 program using the SimpliAmp thermal cycler of Thermo Fisher.<sup>1</sup> DNA tetrahedron was  
24 synthesized in  $1\times$  TM buffer solution (50 mM Tris, 8 mM magnesium chloride, pH 7.0–7.4). The  
25 annealing program starts at 95 °C for 5 min, then immediately cools to 4 °C.<sup>2</sup> The synthesized  
26 DNA origami was purified by Amicon Ultra (100K) centrifugal filters of Merck Millipore  
27 (Darmstadt, Germany) to remove the excess short strands of DNA.

## 28 **1.3 UV exposure**

29 The UVC emission was produced by the Philips UVC lamp (15W), and centred at 254 nm  
30 through the 254 nm optical filter. The radiation intensity of the UVC lamp was  $1.67 \text{ W m}^{-2}$  after  
31 filtering, measured by the S120VC standard photodiode power sensor of Thorlabs (Newton, New  
32 Jersey, USA). The samples were exposed to UVC for variable times (0, 0.167, 0.333, 0.5, 1, 2, 3,  
33 4, 5, 10, 30, 60, and 120 min), corresponding to the doses of 0, 0.0167, 0.0333, 0.05, 0.1, 0.2, 0.3,  
34 0.4, 0.5, 1, 3, 6 and  $12 \text{ kJ m}^{-2}$ , respectively. The UVA emission of 365 nm was produced by multi-

35 UV lamp and the radiation intensity of UVA lamp was  $2.78 \text{ W m}^{-2}$ , measured by the S120VC  
36 standard photodiode power sensor of Thorlabs. Then the samples were exposed to UVA for  
37 variable times (0, 1, 4, and 12 h), corresponding to the doses of 0, 10, 40 and  $120 \text{ kJ m}^{-2}$ ,  
38 respectively.

## 39 **1.4 Characterization**

40 Gel electrophoresis experiments were performed in 0.8% agarose gel for DNA origami and in  
41 2% agarose gel for DNA tetrahedron with  $1\times$  TAE- $\text{Mg}^{2+}$  buffer solution and pre-strain with 0.01%  
42 SYBR Safe.  $8 \mu\text{L}$  of UV-treated sample was mixed with  $2 \mu\text{L}$  of  $6\times$  loading buffer and then loaded  
43 in each well. The electrophoresis ran at 95 V for 60 min in ice-water mixture, then the gels were  
44 imaged by a XR+ gel imaging system of Bio-rad (Hercules, California, USA). AFM images of  
45 DNA nanostructures on mica and on graphene surface were obtained by using the Dimension Fast  
46 Scan AFM system of Bruker (Billerica, Massachusetts, USA) under ScanAsyst-Air mode with  
47 ScanAsyst-Air tips of Bruker. For sample preparation on mica,  $5 \mu\text{L}$  of each DNA origami samples  
48 was pipetted to mica surface and incubated for 20 min at room temperature. Then each sample  
49 was rinsed with  $100 \mu\text{L}$  of deionized water and blown dry with nitrogen gently and immediately.  
50 Field emission scanning electron microscopy (FESEM) images of DNA nanostructures on  
51 graphene surface were obtained by using Gemini SEM500 of Zeiss (Oberkochen, Germany).

## 52 **1.5 Fabrication of the dosimeters**

53 Cr and Au with thicknesses of 5 nm and 50 nm are patterned on the Si/SiO<sub>2</sub> substrates by  
54 photolithography as the electrodes, which were deposited by the Covap vacuum evaporation  
55 system of Angstrom Engineering (Ontario, Canada). The monolayer graphene grown by chemical  
56 vapor deposition (CVD) was transferred onto the patterned substrates to fabricate a FET device.  
57 The sensing regions were defined by patterning graphene channels via photolithography and  
58 oxygen plasma etching techniques. The devices were submerged in 5 mM PASE and acetone  
59 solution for 12 hours at room temperature to assemble a monolayer of PASE on graphene through

60  $\pi$ - $\pi$  stacking, then it was rinsed with water and ethanol alternately for several times to remove  
61 extra PASE. The modified graphene devices were immersed in DNA nanostructure buffer solution  
62 by PDMS well for 24 hours to immobilize DNA nanostructures on graphene channels, followed  
63 by rinsing with water gently to remove extra DNA nanostructures. The incubation concentration  
64 of ss-DNA, ds-DNA, DNA tetrahedron and DNA origami is 2  $\mu$ M, 1  $\mu$ M, 10 nM and 1  $\mu$ M.

## 65 **1.6 Device measurement**

66 The electrical signals were measured by the B1500A semiconductor analyzer of Keysight (Santa Clara,  
67 California, USA). Ag/AgCl reference electrode was used as the liquid gate electrode.  $V_{lg}$  was set between  
68  $-0.8$  and  $+0.8$ V versus Ag/AgCl and the  $V_{ds}$  was set to 50 mV in which no electrochemical reaction occurs  
69 on the graphene or electrodes. The current variation signals were normalized as  $\Delta I/I_0 = (I_0 - I_{ds})/I_0$ , where  
70  $I_{ds}$  is the real-time drain-source current and  $I_0$  is the current of the initial dosimeters. The error bars were  
71 calculated from test results of 5 different devices via the mean and standard deviation model.

## 73 **2 Supplementary Notes**

### 74 **2.1 Sequences of staple strands (5' to 3')**

#### 75 **2.1.1 tetrahedron**

76 ACATTCCTAAGTCTGAAACATTACAGCTTGCTACACGAGAAGAGCCGCCATAGTA

77 NH<sub>2</sub>-C<sub>6</sub>-

78 TATCACCAGGCAGTTGACAGTGTAGCAAGCTGTAATAGATGCGAGGGTCCAATAC

79 NH<sub>2</sub>-C<sub>6</sub>-TCAACTGCCTGGTGATAAAACGACACTACGTGGGAATCTACTATGGCGGCTCTTC

80 NH<sub>2</sub>-C<sub>6</sub>-TTCAGACTTAGGAATGTGCTTCCCACGTAGTGTCGTTTGTATTGGACCCTCGCAT

#### 81 **2.1.2 DNA Origami**

82 Modified DNA strands:

83 AAACAGTTGATGGCTTAGAGCTTATTTAAATATTTT-C<sub>6</sub>NH<sub>2</sub>

84 TCAGAAGCCTCCAACAGGTCAGGATCTGCGAATTTT- C<sub>6</sub>NH<sub>2</sub>

85 ATTATTTAACCAGCTACAATTTTCAAGAACGTTTT- C<sub>6</sub>NH<sub>2</sub>

86 CTTTACAGTTAGCGAACCTCCCGACGTAGGAATTTT- C<sub>6</sub>NH<sub>2</sub>

87 CTAAACATCAGCTTGCTTTCGAGAAACAGTTTTTT- C<sub>6</sub>NH<sub>2</sub>

88 GAATAAGGACGTAACAAAGCTGCTGACGGAAATTTT- C<sub>6</sub>NH<sub>2</sub>

89 TTTTAATTGCCCGAAAGACTTCAATTCCAGAGTTTT- C<sub>6</sub>NH<sub>2</sub>

90 AGACAGTCATTCAAAGGGTGAGATATCATATTTT- C<sub>6</sub>NH<sub>2</sub>

91 TTCGCCATTGCCGAAACCAGGCAAACAGTACTTTT- C<sub>6</sub>NH<sub>2</sub>

92 CCGAAATCCGAAAATCCTGTTTGAAATACCGATTTT- C<sub>6</sub>NH<sub>2</sub>

### 93 **2.3 ss-DNA and ds-DNA**

94 ss-DNA:

95 NH<sub>2</sub>-C<sub>6</sub>-CCATACCCTTTCCACATACCGCAGAGGC  
96 ds-DNA:  
97 NH<sub>2</sub>-C<sub>6</sub>-CCATACCCTTTCCACATACCGCAGAGGC  
98 GCCTCTGCGGTATGTGGAAAGGGTATGG

## 99 2.2 Calculation of LoDs

100 Response curves of the UVC dosimeters follow the ‘S-shaped curves’ which are typical dose response  
101 curves. The linear standard curves are fitted in the linear detection range to calculate the LoDs of the UVC  
102 dosimeters. The noises are taken from the difference of the highest and lowest responses in real-time  $I_{ds}$   
103 versus time curves, as shown in Fig. S10. Noises plus three times are taken as the noise levels and the  
104 LoDs are calculated from the intersection of the noise levels and the linear standard curves, as shown in  
105 Fig. S11. The confidence of the calculation method is higher than 99.99% in a normal distribution model,  
106 for the noise levels are set as higher than the standard deviations of real-time  $I_{ds}$  plus ten times. The noise  
107 levels of UVC dosimeters working in buffer solution and in air are 0.0736% and 0.1111% respectively.  
108 The calculated LoDs are 0.0051 kJ m<sup>-2</sup> and 0.0061 kJ m<sup>-2</sup> in UVC dosimeters modified with DNA  
109 tetrahedron and DNA origami working in buffer solution respectively, while the LoDs of UVC dosimeters  
110 working in air are 0.0058 kJ m<sup>-2</sup> and 0.0065 kJ m<sup>-2</sup> respectively.

## 111 2.3 Density and equivalent charge of PASE and DNA nanostructures

112 Application of a liquid-gated g-FET leads to the formation of electrical double layers (EDLs) at a  
113 polarizable electrode/electrolyte interface<sup>3</sup>. The EDLs at liquid-graphene interfaces can be considered as  
114 insulating layers. The total gate capacitance ( $C_{tot}$ ) of a g-FET is made of the EDL capacitance  $C_{liq}$  and the  
115 quantum capacitance of graphene  $C_Q$  in series with:

$$116 \quad \frac{1}{C_{tot}} = \frac{1}{C_{liq}} + \frac{1}{C_Q} = \frac{1}{c_{liq}S_{liq}} + \frac{1}{c_Q S_Q} \#(1)$$

117 Here,  $c_{tot}$ ,  $c_{liq}$  and  $c_Q$  are the capacitances per unit area.  $S_{tot}$ ,  $S_{liq}$  and  $S_Q$  are the contact areas which can be  
 118 considered as the channel areas. Each channel area  $S$  is equal to  $30 \times 60 \mu\text{m}^2$ .  $c_Q$  is graphene quantum  
 119 capacitance per unit area of  $\sim 20 \text{ mF m}^{-2}$ .<sup>4,5</sup> The EDL capacitance  $c_{liq}$  is estimated as  $\sim 96 \text{ mF m}^{-2}$ .<sup>3</sup> The  
 120 total gate capacitance per unit area ( $c_{tot}$ ) of g-FET is calculated as  $\sim 17 \text{ mF m}^{-2}$ .

121 The charge change  $\Delta Q$  and Dirac point shift  $\Delta V_{Dirac}$  occur when the PASE and DNA nanostructures are  
 122 anchored on the graphene channel surface:

$$123 \quad \Delta V_{Dirac} = \Delta Q \left( \frac{1}{C_{liq}} + \frac{1}{C_Q} \right) \#(2)$$

$$124 \quad \Delta Q = q S n \#(3)$$

125 Here,  $n$  is the modification density,  $q$  is the equivalent charge per molecule of modification. According to  
 126 the equation (1), (2) and (3),  $\Delta V_{Dirac}$  is equal to  $60 q n \text{ V m}^2 \text{ C}^{-1}$ , which is proportional to the equivalent  
 127 charge per molecule  $q$  and density  $n$ . The  $\Delta V_{Dirac}$  versus bare g-FETs of the devices modified by PASE  
 128 and DNA nanostructures is shown in Fig. S9c.

129 The density of PASE  $n_{PASE}$  can be quantitatively evaluated from the comparison between graphene  
 130 modified with PASE and PASE solution. According to Lambert-Beer's law, it is assumed that molar  
 131 absorption coefficient ( $\epsilon$ ) is constant both in membrane and in solution:

$$132 \quad n_{PASE} = c_{PASE} l_{PASE} = \frac{A_{PASE}}{\epsilon} \#(4)$$

133 Here,  $n_{PASE}$ ,  $c_{PASE}$ ,  $l_{PASE}$  and  $A_{PASE}$  are the modification density of PASE, concentration of PASE solution,  
 134 thickness and absorbance of graphene modified with PASE, respectively.  $\epsilon$  is calculated as  $\sim 4100 \text{ m}^2$   
 135  $\text{mol}^{-1}$  and  $n_{PASE}$  is estimated as  $\sim 2.2 \times 10^{18} \text{ m}^{-2}$ . The density of DNA nanostructures is counted from  
 136 FESEM images (five images,  $1 \times 1 \mu\text{m}^2$ ) and AFM images (five images,  $1 \times 1 \mu\text{m}^2$ ), examples are shown in  
 137 Fig. S4, Fig. S2b and Fig. S3a. The density of DNA origami  $n_{ori}$  and the density of DNA tetrahedron  $n_{tetra}$

138 can be estimated as  $10 \pm 4 \mu\text{m}^{-2}$  and  $85 \pm 11 \mu\text{m}^{-2}$  respectively. Thus, the equivalent charge per PASE  $q_{PASE}$   
139 is  $\sim 8.7 \times 10^{-22}$  C. And the equivalent charge per DNA origami  $q_{ori}$  and the equivalent charge per DNA  
140 tetrahedron  $q_{tetra}$  can be calculated as  $\sim 6.2 \times 10^{-17}$  C and  $\sim 8.0 \times 10^{-18}$  C, which is equal to the charge carried  
141 by 385 electrons and 50 electrons respectively.



143 **3 Supplementary Figures**

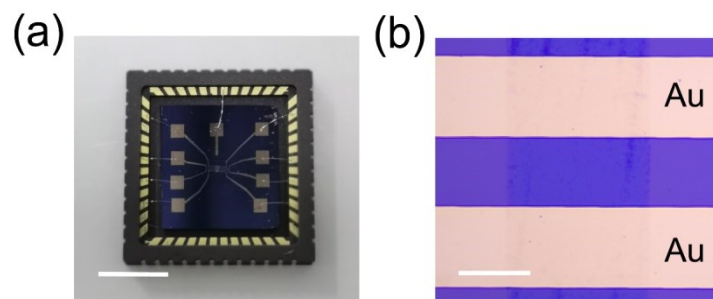

144

145 **Fig. S1.** (a) Photograph and (b) optical microscope image of the UVC dosimeters. Scale bars: (a) 500  $\mu\text{m}$

146 and (b) 40  $\mu\text{m}$ .

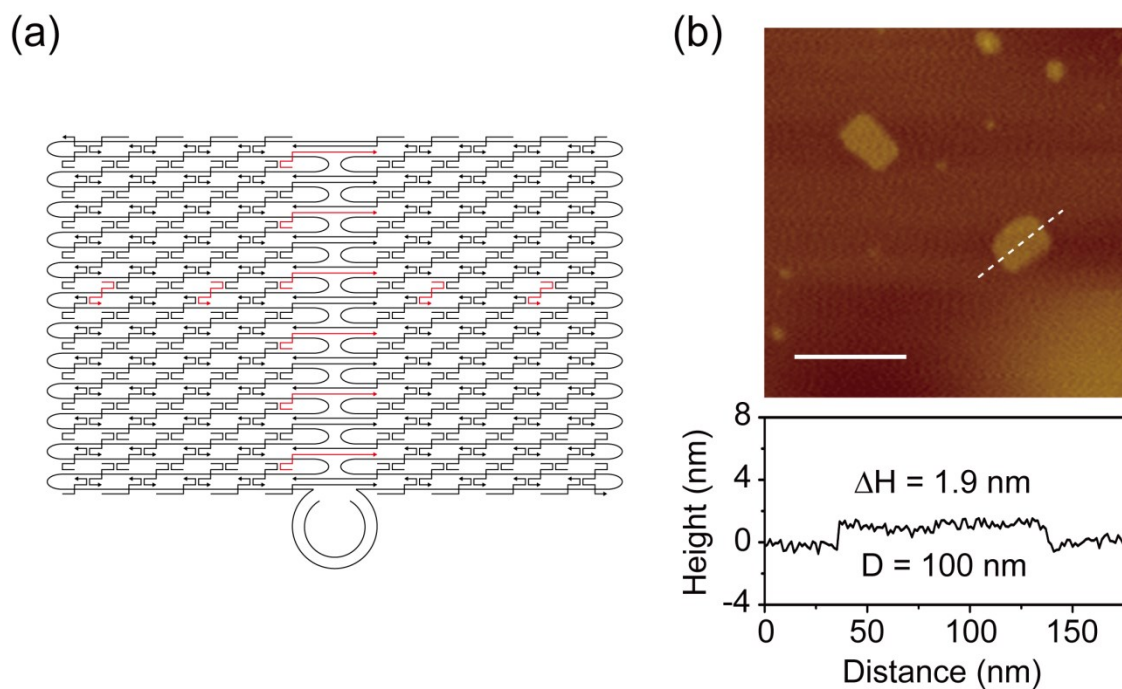

147

148 **Fig. S2.** (a) Design diagram of the rectangular DNA origami.<sup>1</sup> Red lines represent staple strands which

149 are modified with amino groups. (b) AFM image of the DNA origami on mica. Scale bar is 200 nm.

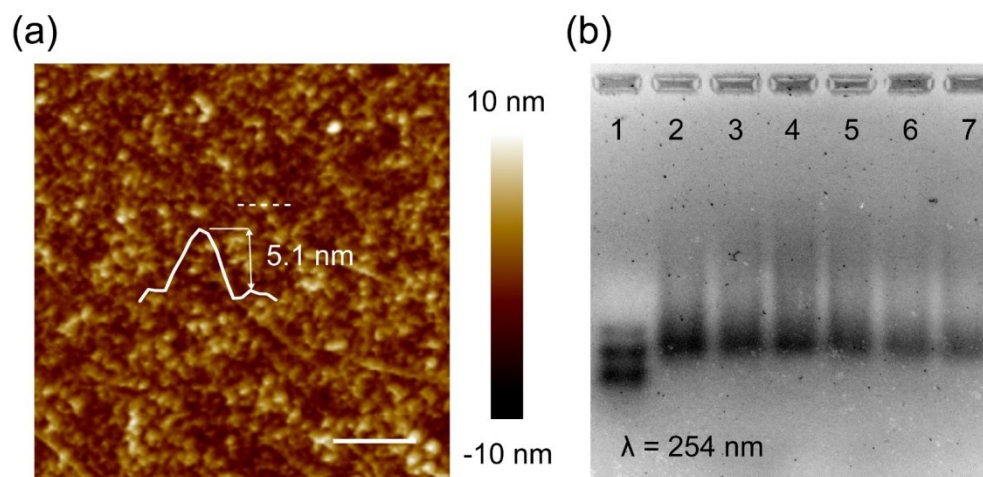

150

151 **Fig. S3.** (a) AFM image of the DNA tetrahedron on graphene surface. Scale bar is 200 nm. (b) AGE  
 152 characterizations of DNA tetrahedron at various UVC doses. Lanes 1–7: DNA marker, 0, 0.1, 0.3, 0.5, 1,  
 153 and 3 kJ m<sup>-2</sup> doses, respectively. The image colour is inverted to display more clearly.

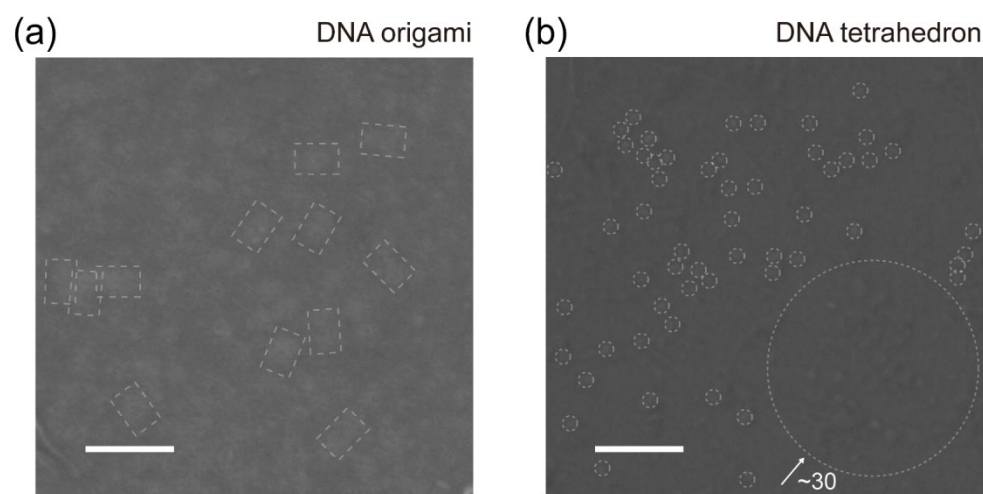

154

155 **Fig. S4.** (a) FESEM image of graphene immobilized with DNA origami. (b) FESEM image of graphene  
 156 immobilized with DNA tetrahedron. Some of the nanostructures are marked with white dotted line and  
 157 the scale bars are 200 nm.

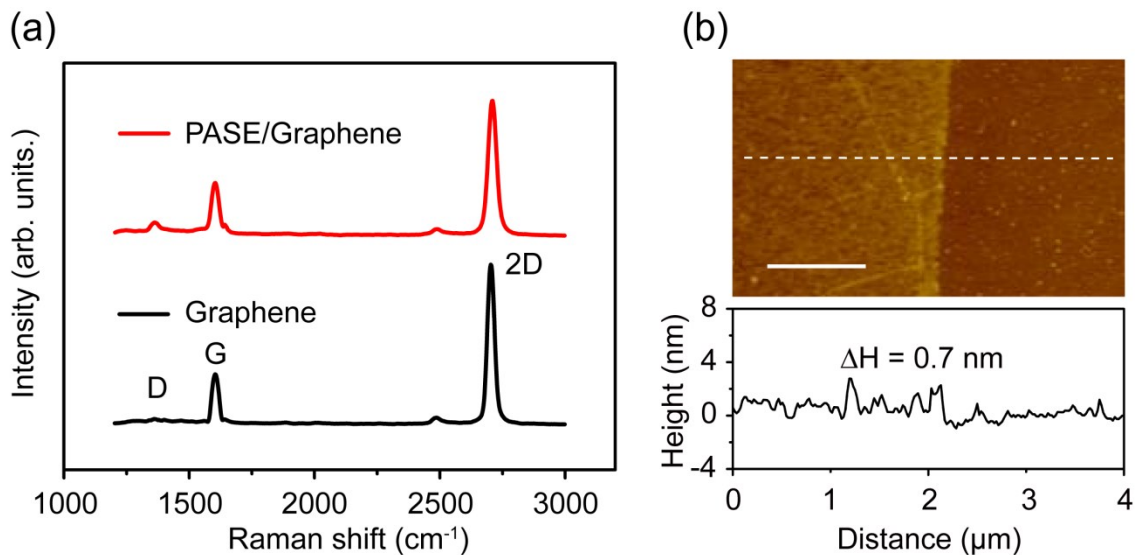

158

159 **Fig. S5.** (a) Raman spectra of graphene and PASE modified graphene. The tiny D peak and a high intensity  
 160 ratio of the 2D peak with the G peak in Raman spectra of graphene indicate high quality and monolayer  
 161 nature of the CVD grown samples. (b) AFM image of the monolayer graphene. Scale bar is 1  $\mu\text{m}$ .

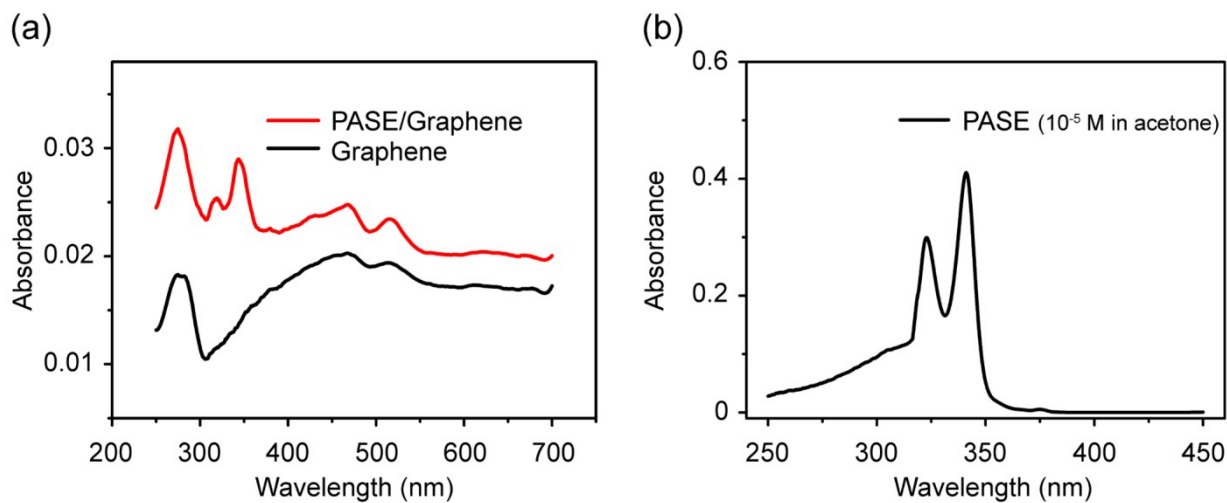

162

163 **Fig. S6.** (a) UV-vis absorption spectra of graphene and PASE modified graphene. (b) UV-vis absorption  
 164 spectrum of  $10^{-5}$  M PASE in acetone.

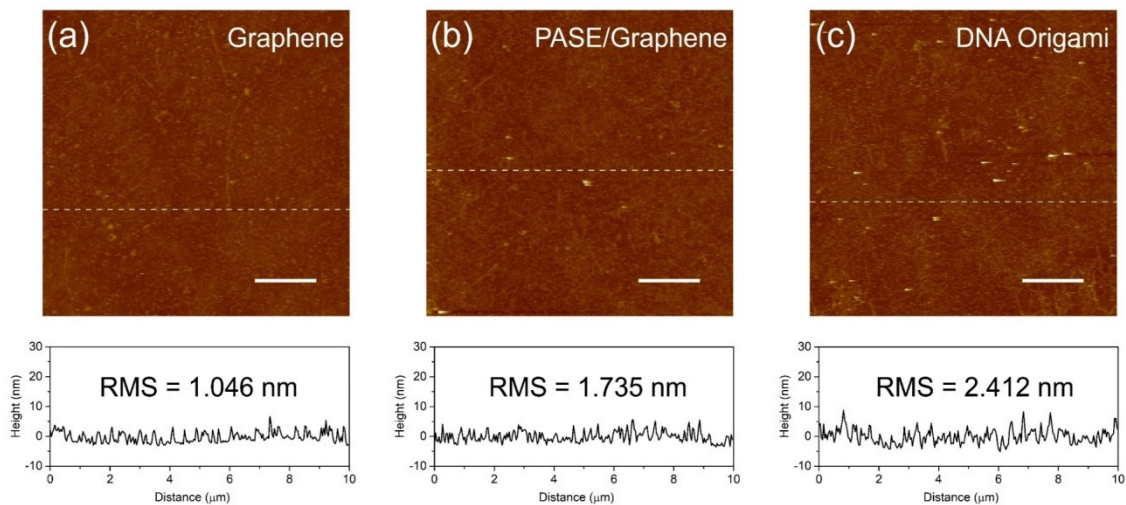

165

166 **Fig. S7.** AFM images of (a) pristine graphene, (b) PASE modified graphene and (c) DNA Origami  
 167 modified graphene. Scale bars are 2  $\mu\text{m}$ .

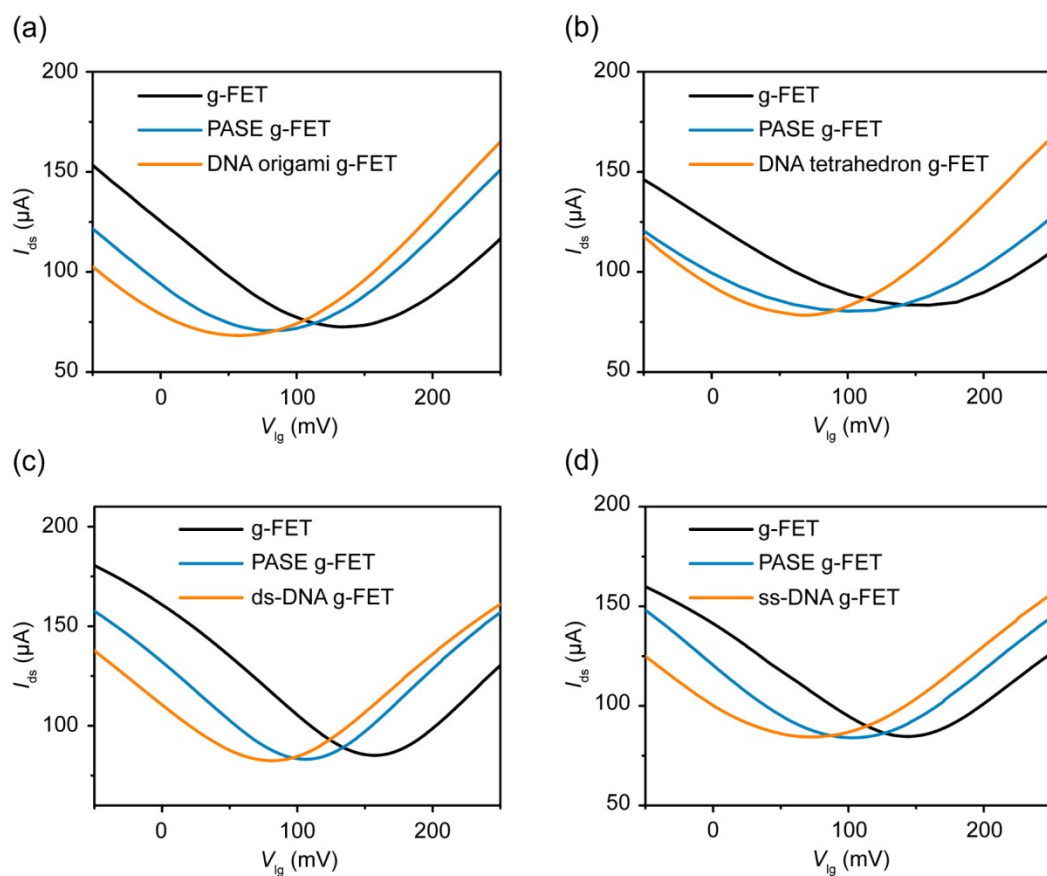

168

169 **Fig. S8.** Transfer curves of bare g-FET, PASE modified g-FET and DNA materials modified g-FET ( $V_{ds} =$   
 170 50 mV). DNA materials are (a) DNA origami, (b) DNA tetrahedron (c) ds-DNA and (d) ss-DNA.

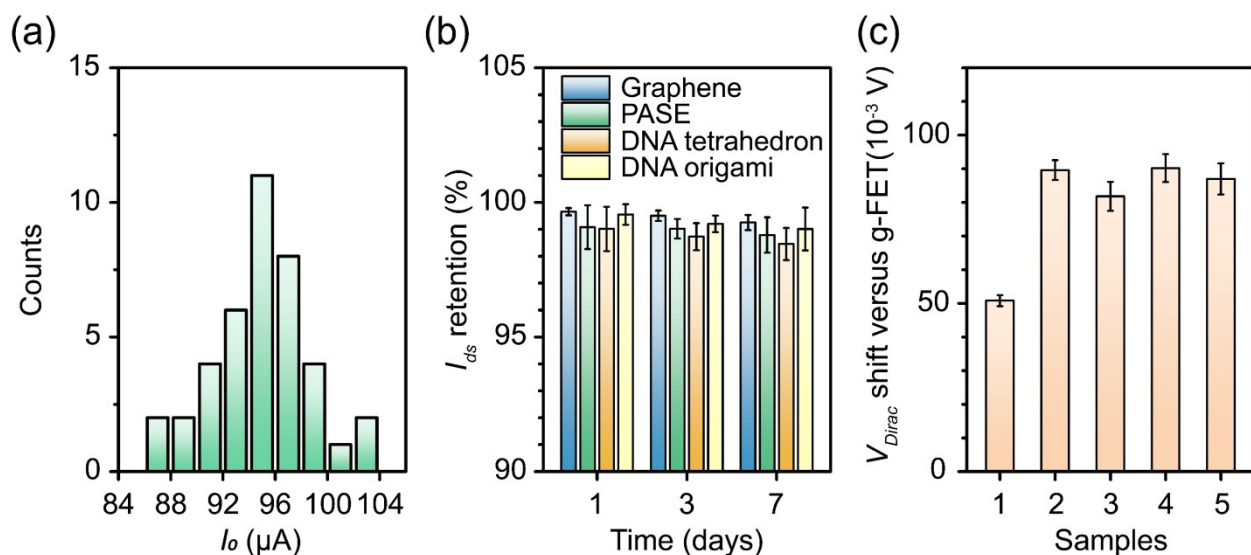

171

172 **Fig. S9.** (a) The  $I_0$  distribution of DNA origami modified g-FETs before UVC irradiation ( $V_{ds}=50$  mV).  
 173 (b)  $I_{ds}$  retention of bare g-FETs, PASE modified g-FETs, DNA tetrahedron modified g-FETs and DNA  
 174 origami modified g-FETs. (c) The Dirac point shift versus bare g-FETs of the devices modified by PASE  
 175 and DNA materials. Sample 1–5: PASE, ss-DNA, ds-DNA, DNA tetrahedron and DNA origami.

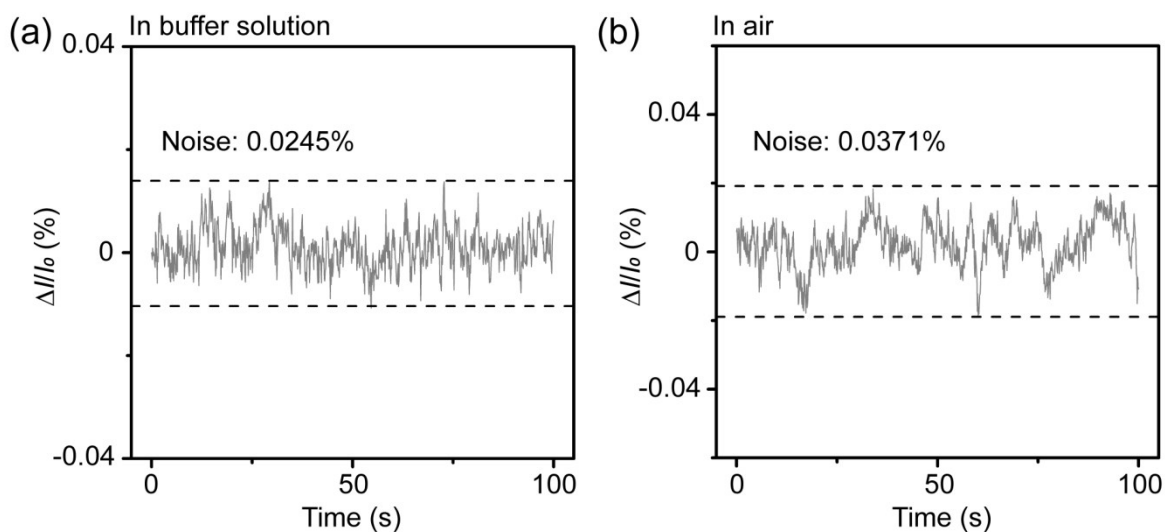

176

177 **Fig. S10.** Real-time  $\Delta I/I_0$  response versus time of DNA origami modified g-FETs working in buffer  
 178 solution (a) and in air (b). The noises are measured to be 0.0245% and 0.0371%.



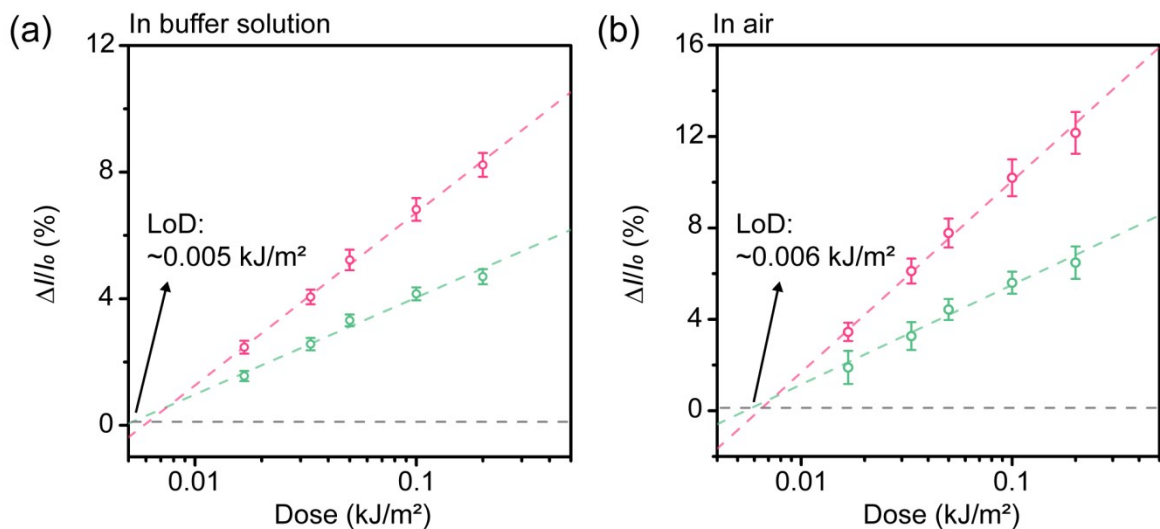

179

180 **Fig. S11.**  $\Delta I/I_0$  versus UVC dose and LoD calculation of devices working in buffer solution (a) and in air  
 181 (b). Red data points and red dotted lines represent response of DNA origami modified g-FETs, green data  
 182 points and green dotted lines represent response of DNA tetrahedron modified g-FETs.

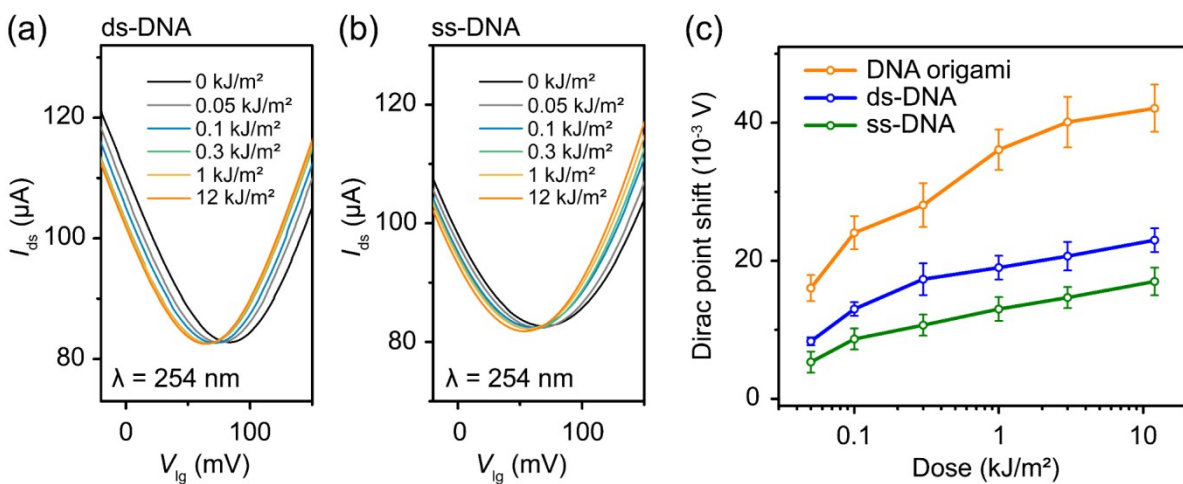

183

184 **Fig. S12.** (a) Transfer curves of the dosimeters modified with ds-DNA at different UVC doses ( $V_{ds}= 50$   
 185 mV). (b) Transfer curves of the dosimeters modified with ss-DNA at different UVC dose ( $V_{ds}= 50$  mV).  
 186 (c) The Dirac point shift versus doses of the UVC dosimeters modified with DNA origami, ds-DNA and  
 187 ss-DNA.

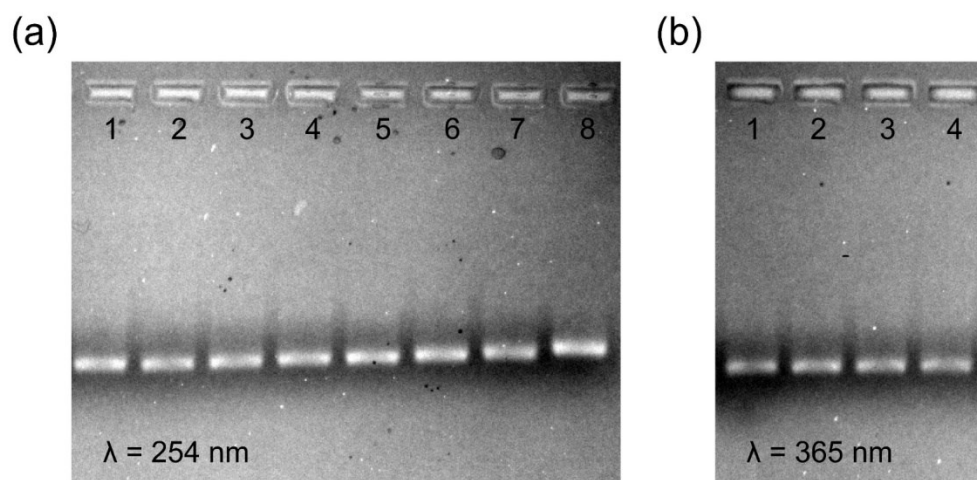

188

189 **Fig. S13.** (a) AGE characterizations of DNA origami at various UVC doses. Lanes 1–8: 0, 0.1, 0.3, 0.5,  
 190 1, 3, 6 and 12  $\text{kJ m}^{-2}$  doses, respectively. (b) AGE characterizations of DNA origami at various UVA  
 191 doses. Lanes 1–4: 0, 10, 40 and 120  $\text{kJ m}^{-2}$  doses, respectively.

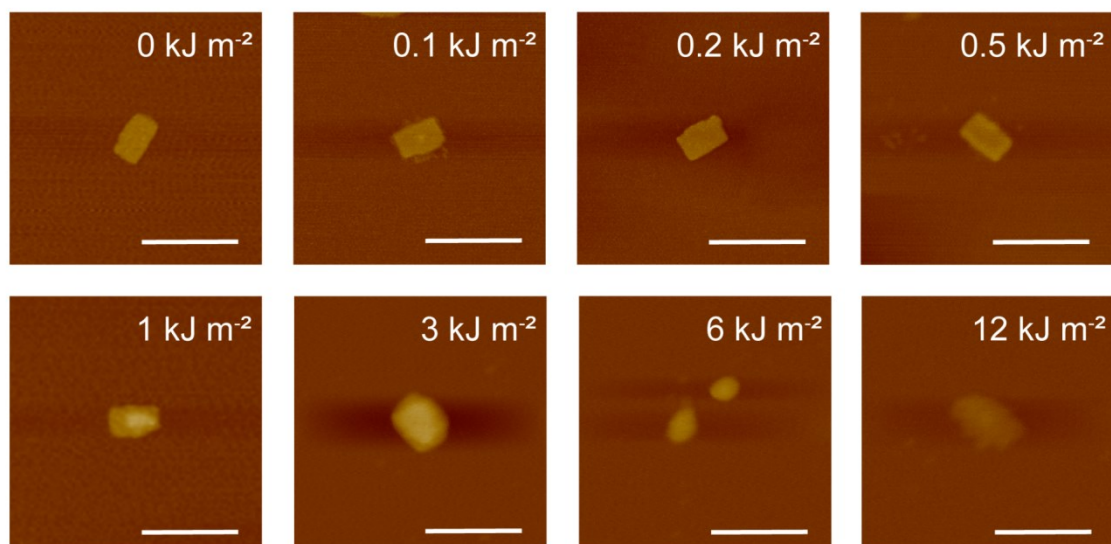

192

193 **Fig. S14.** AFM images of DNA origami at various UVC doses. Scale bars are 200 nm.

194

195

196 **4 Supplementary Table**

| Materials                                                                                                              | Methods                     | Target UV | Range (kJ m <sup>-2</sup> ) | Highlights                                                                                             | Ref       |
|------------------------------------------------------------------------------------------------------------------------|-----------------------------|-----------|-----------------------------|--------------------------------------------------------------------------------------------------------|-----------|
| The viologen-based polymer with an Anderson-like metal carboxylate cluster                                             | Colorimetric method         | UVA       | 6.72–17.42                  | Wide dynamic dose range and improving the repeatability of the photochromic process                    | 6         |
| (4-phenoxyphenyl) diphenylsulfonium triflate with crystal violet lactone and Congo red                                 | Colorimetric method         | UVA       | 0.5–8                       | Providing wearable, highly sensitive and accurate measurements                                         | 7         |
| An ink consisting of a multi-redox polyoxometalate and an e <sup>-</sup> donor                                         | Colorimetric method         | UVC       | 0.025–18                    | Low cost, highly sensitive and stable detection                                                        | 8         |
| Gel infused with leuco crystal viole, 4-(1,1,3,3-tetramethylbutyl) phenyl-polyethylene glycol and trichloroacetic acid | Colorimetric method         | UVC       | 0.05–1.5                    | 3D dosimeter with high sensitivity                                                                     | 9         |
| Polycaprolactone doped with tetrazolium salts                                                                          | Colorimetric method         | UVC       | 0.5–20                      | Low uncertainty and wide dynamic dose range                                                            | 10        |
| DNA Origami                                                                                                            | Agarose gel electrophoresis | UVC       | 4.25–34                     | First work to use UV radiation to control DNA origami conformation                                     | 11        |
| DNA Origami                                                                                                            | Atomic force microscope     | UVC       | 2.16–25.92                  | New method to detect UV dose with high biocompatibility                                                | 12        |
| DNA nanostructures                                                                                                     | Transistor sensor           | UVC       | 0.005–6                     | Rapid, portable, quantitative, highly sensitive, specific and easily operational detection of UVC dose | This work |

197 **Table S1.** Sensing properties of some UV dosimeters and their highlights.



## References

1. P. W. K. Rothmund, *Nature*, 2006, **440**, 297–302.
2. M. Lin, J. Wang, G. Zhou, J. Wang, N. Wu, J. Lu, J. Gao, X. Chen, J. Shi, X. Zuo and C. Fan, *Angew. Chem. Int. Ed.*, 2015, **54**, 2151–2155.
3. S. Xu, J. Zhan, B. Man, S. Jiang, W. Yue, S. Gao, C. Guo, H. Liu, Z. Li, J. Wang and Y. Zhou, *Nat. Commun.*, 2017, **8**, 14902.
4. Y. Ohno, K. Maehashi, Y. Yamashiro and K. Matsumoto, *Nano Lett.*, 2009, **9**, 3318–3322.
5. X. Guo, A. A. Gorodetsky, J. Hone, J. K. Barton and C. Nuckolls, *Nat. Nanotech.* 2008, **3**, 163–167.
6. S. Li, M. Han, Y. Zhang, G. Li, M. Li, G. He and X. Zhang, *J. Am. Chem. Soc.*, 2019, **141**, 12663–12672.
7. H. Araki, J. Kim, S. Zhang, A. Banks, K. E. Crawford, X. Sheng, P. Gutruf, Y. Shi, R. M. Pielak and J. A. Rogers, *Adv. Funct. Mater.*, 2017, **27**, 1604465.
8. W. Zou, A. Gonzalez, D. Jampaiah, R. Ramanathan, M. Taha, S. Walia, S. Sriram, M. Bhaskaran, J. M. Dominguez-Vera and V. Bansal, *Nat. Commun.*, 2018, **9**, 3743.
9. M. Kozicki, M. Bartosiak, M. Dudek and S. Kadlubowski, *J. Photoch. Photobio. A.*, 2021, **405**, 112930.
10. E. Sasiadek and M. Kozicki, *Autex Res. J.*, 2020, **20**, 140–147.
11. H. Chen, R. Li, S. Li, J. Andreasson and J. Choi, *J. Am. Chem. Soc.*, 2017, **139**, 1380–1383.
12. W. Fang, M. Xie, X. Hou, X. Liu, X. Zuo, J. Chao, L. Wang, C. Fan, H. Liu and L. Wang, *J. Am. Chem. Soc.*, 2020, **142**, 8782–8789.
